# Supplementary material for: Comprehensive and quantitative multilocus methylation analysis reveals the susceptibility of specific imprinted differentially methylated regions to aberrant methylation in Beckwith–Wiedemann syndrome with epimutations
Source: PubMed Central journal article supplement — Genet Med. 2014 May 8;16(12):903–12. doi: 10.1038/gim.2014.46 (PMC4262761; doi:10.1038/gim.2014.46), 2014-05-08

Supplementary Figure S1

# ARHI-CG1, CG2, CG3

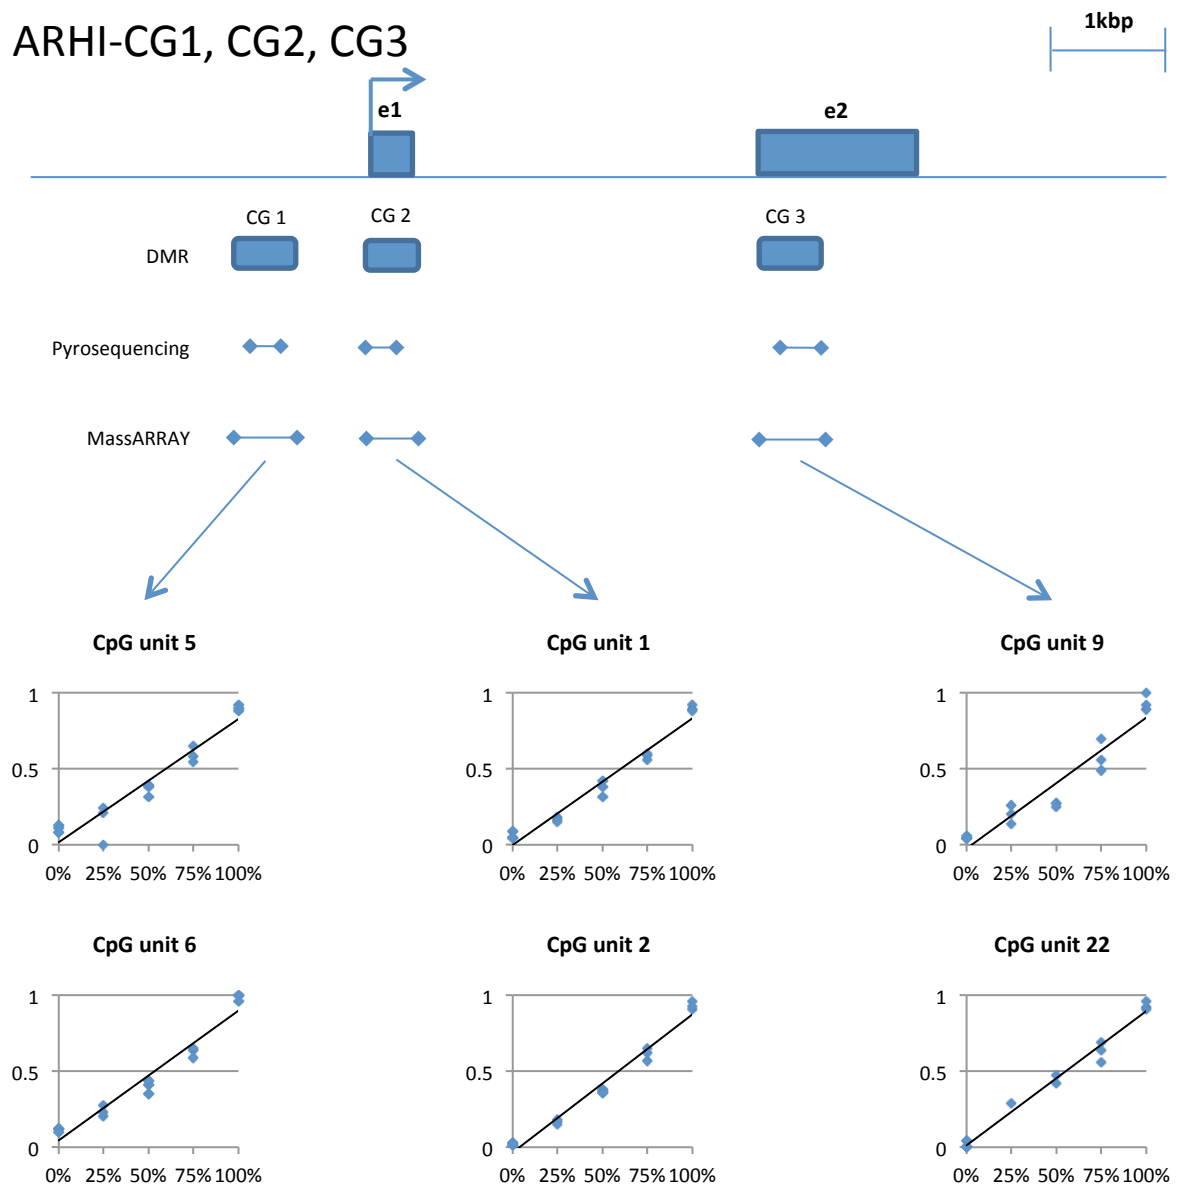

# ZDBF2

3kbp

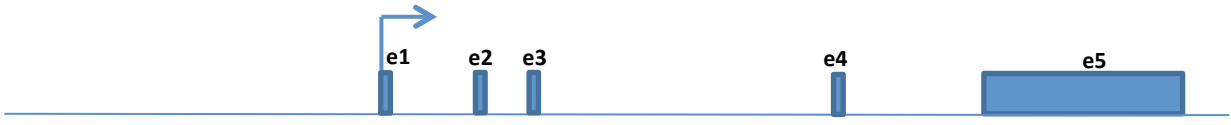

DMR 

Pyrosequencing 

MassARRAY 

CpG unit 2

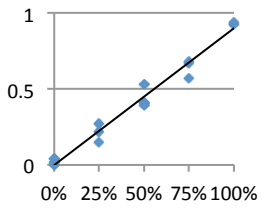

CpG unit 3

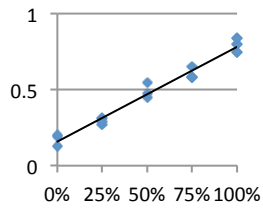

# NAP1L5

1kbp

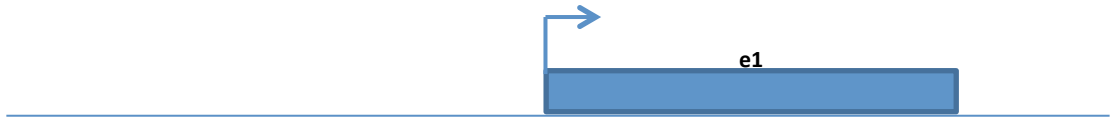

DMR 

Pyrosequencing 

MassARRAY 

CpG unit 4

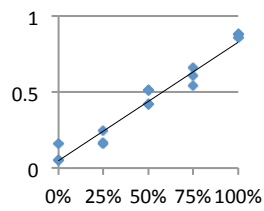

CpG unit 15

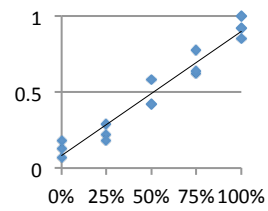

# FAM50B

1kbp

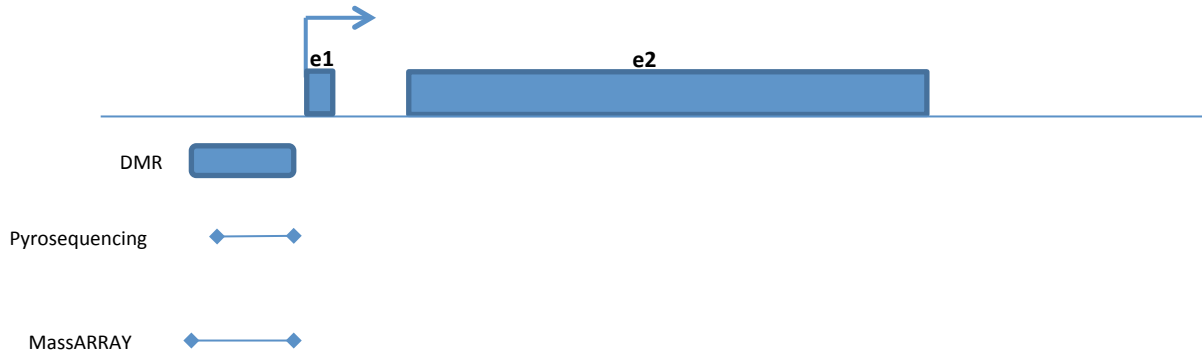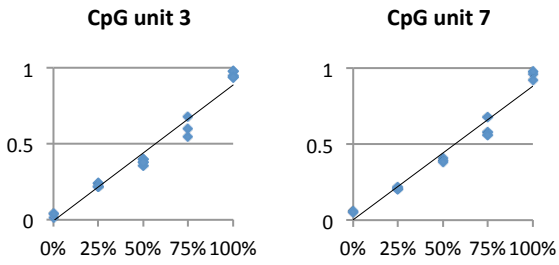

# ZAC

10kbp

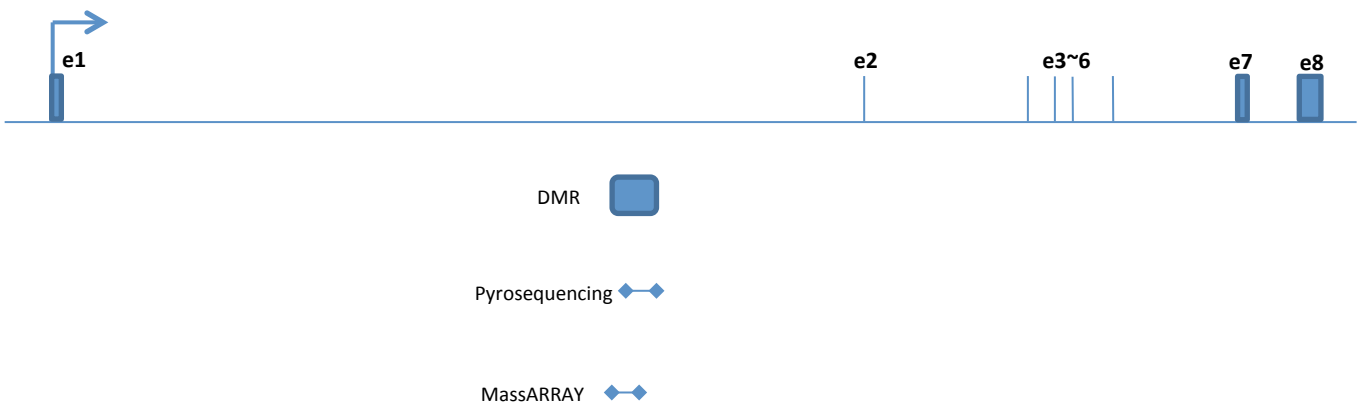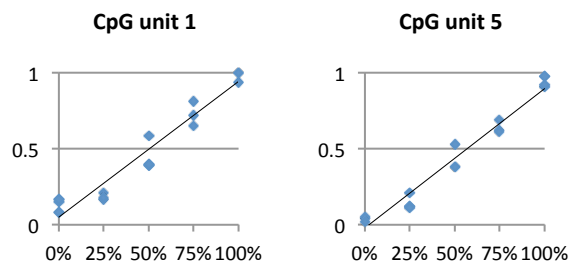

# IGF2R-DMR2

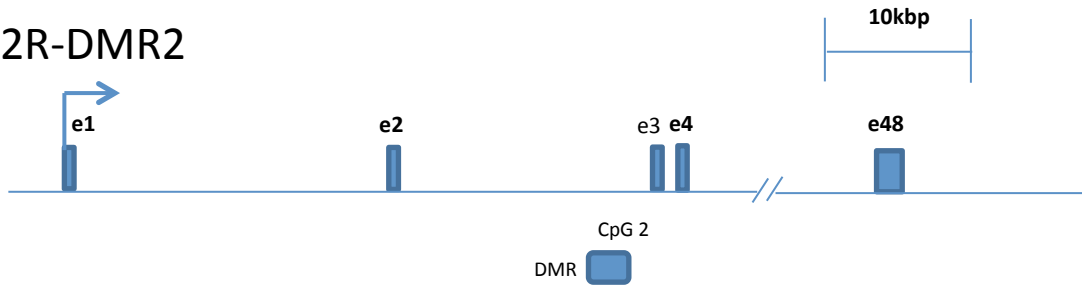

Pyrosequencing

MassARRAY

CpG unit 3

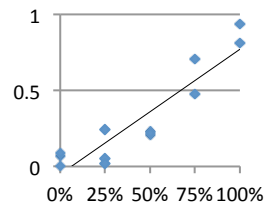

CpG unit 8

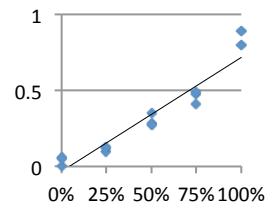

# PEG10

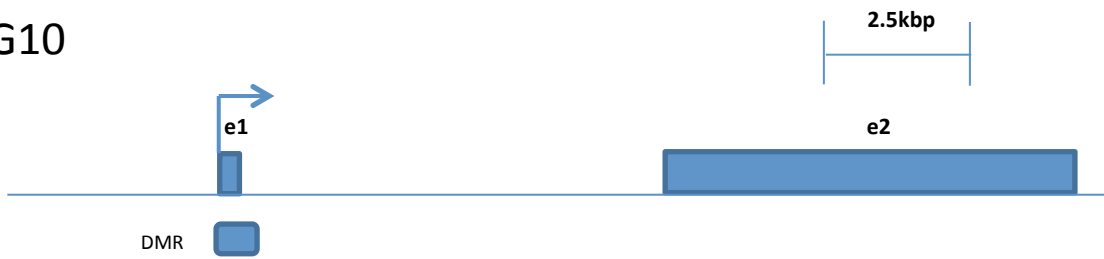

Pyrosequencing

MassARRAY

CpG unit 1

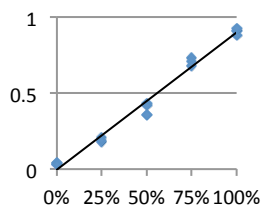

CpG unit 2

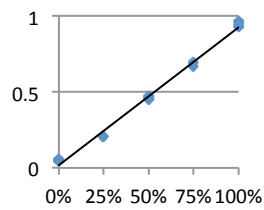

# PEG1

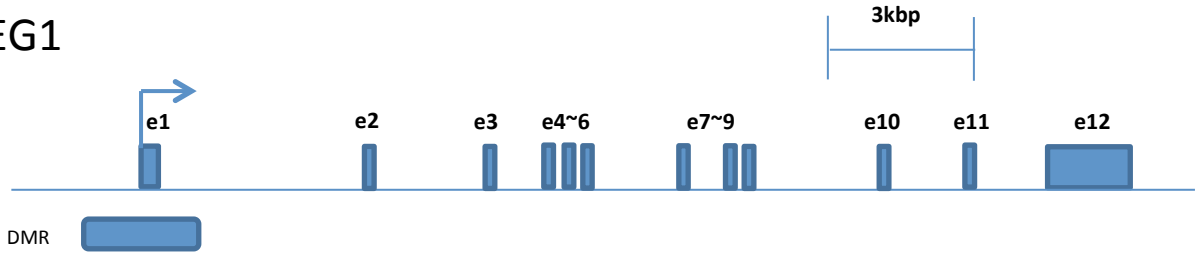

Pyrosequencing

MassARRAY

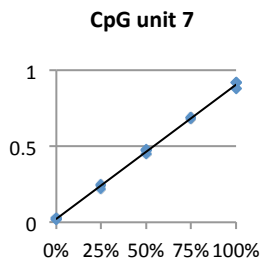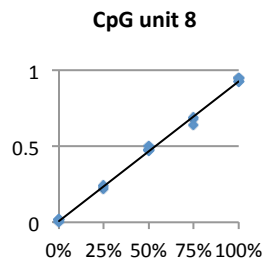

# INPPF-V2

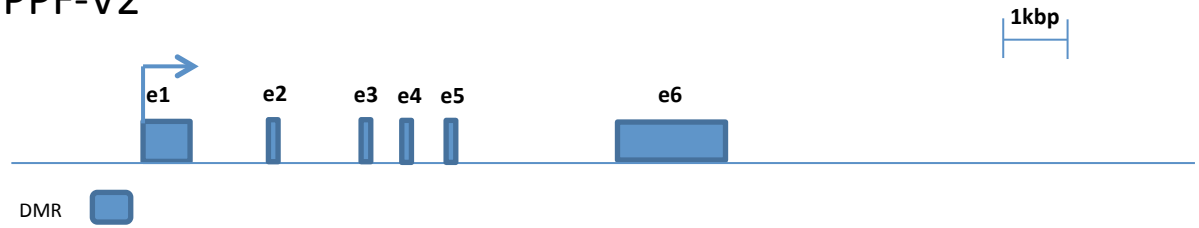

Pyrosequencing

MassARRAY

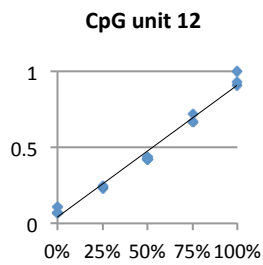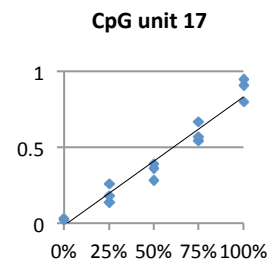

## H19DMR, H19promoter

500bp

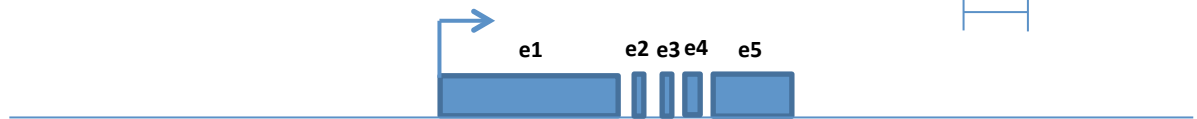

DMR

Pyrosequencing

MassARRAY

H19DMR

H19promoter

CpG unit 11

CpG unit 13

CpG unit 7

CpG unit 17

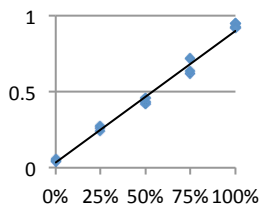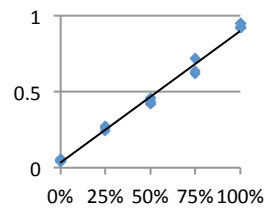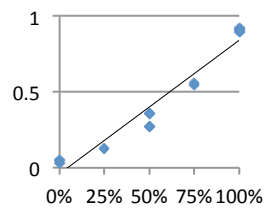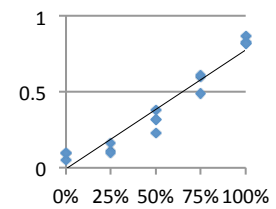

## IGF2-DMR0, DMR2

1kbp

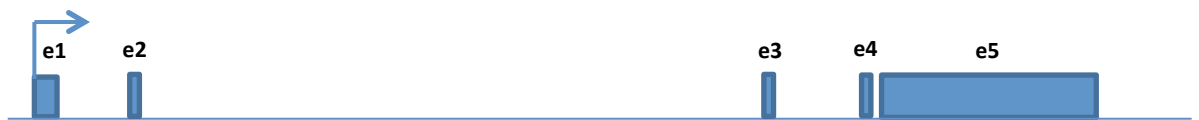

DMR

Pyrosequencing

MassARRAY

IGF2-DMR0

IGF2-DMR2

CpG unit 1

CpG unit 6

CpG unit 8

CpG unit 22

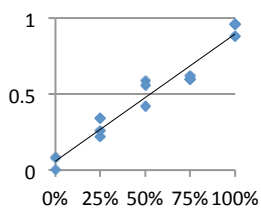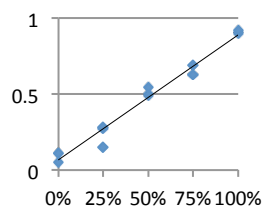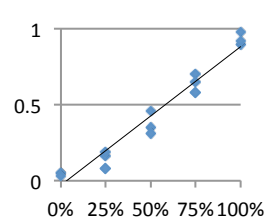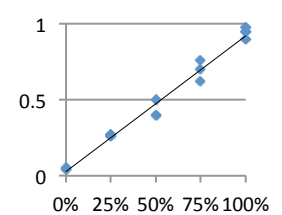

# KvDMR1

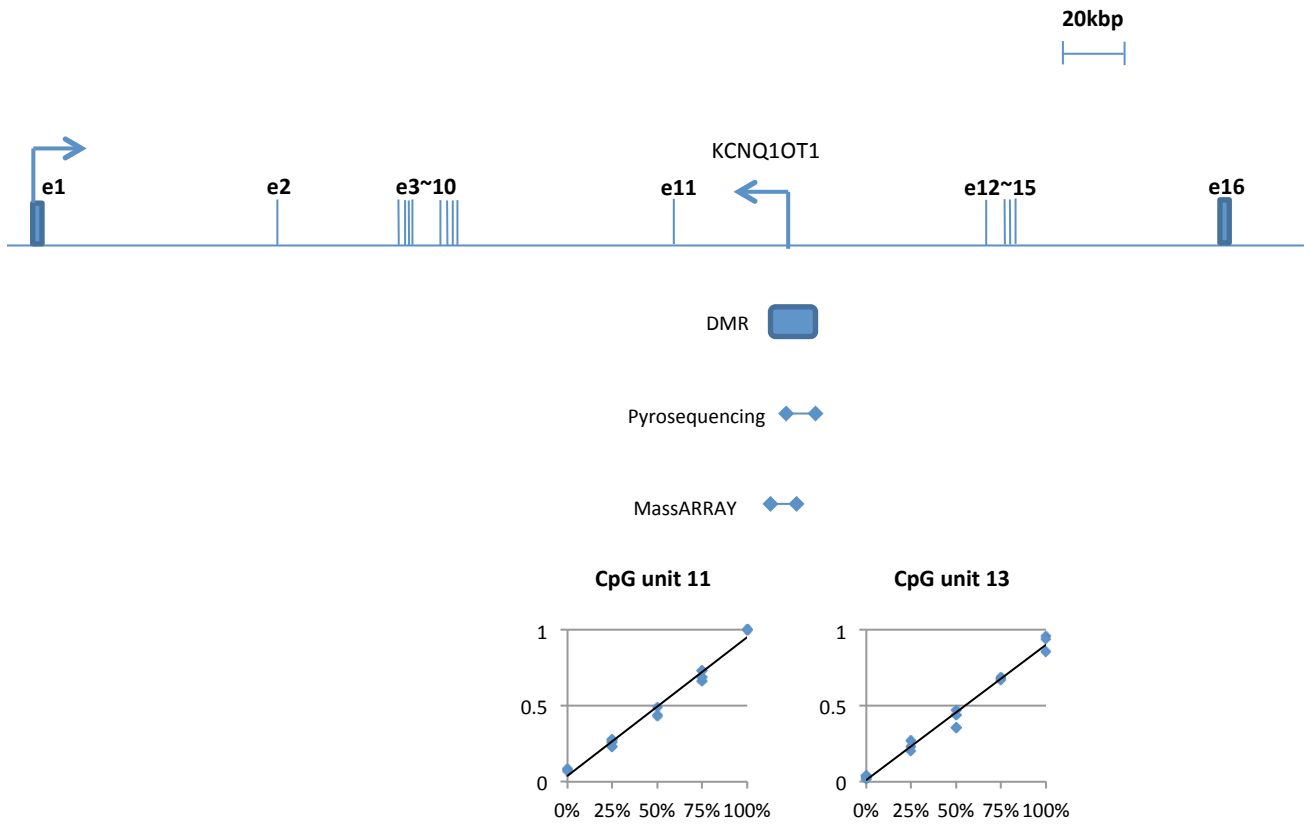

# RB1

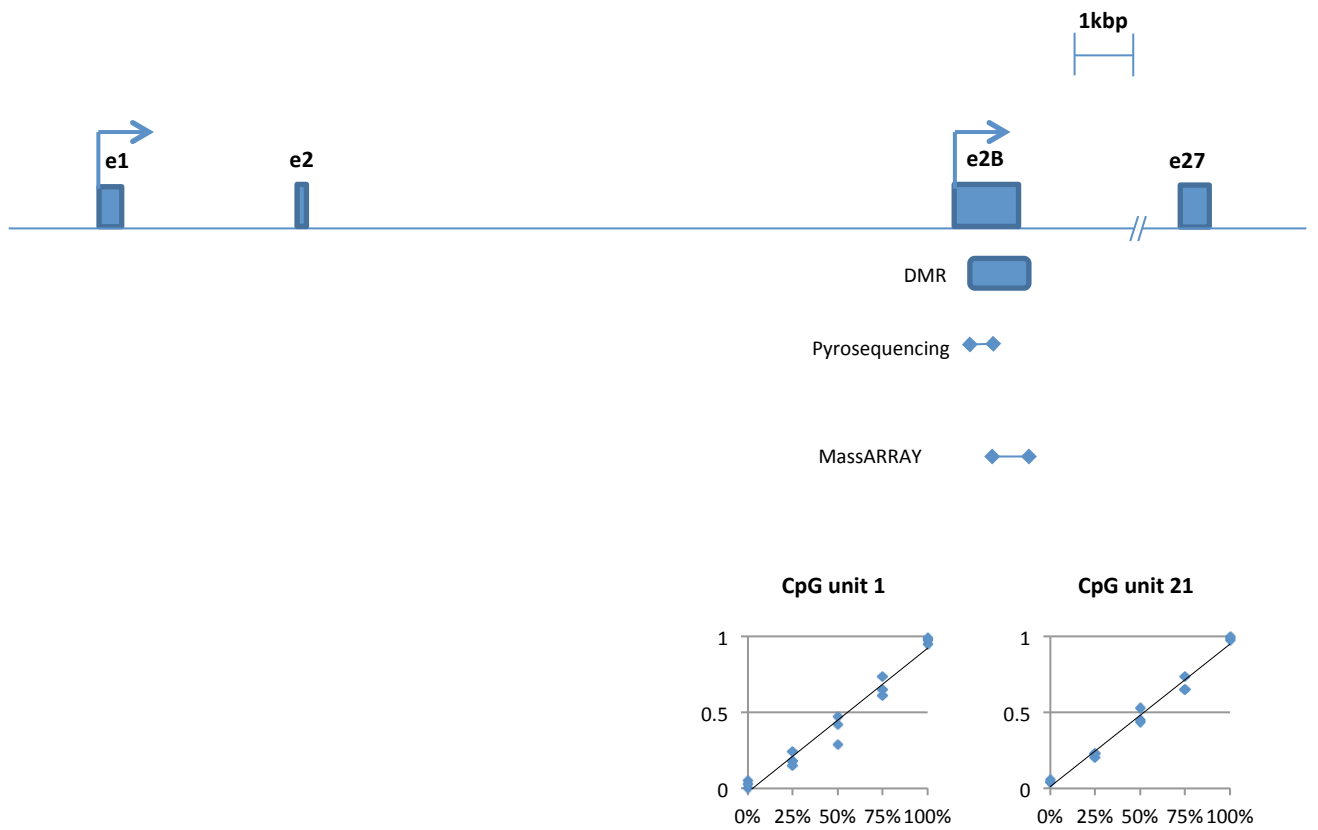

# DLK1

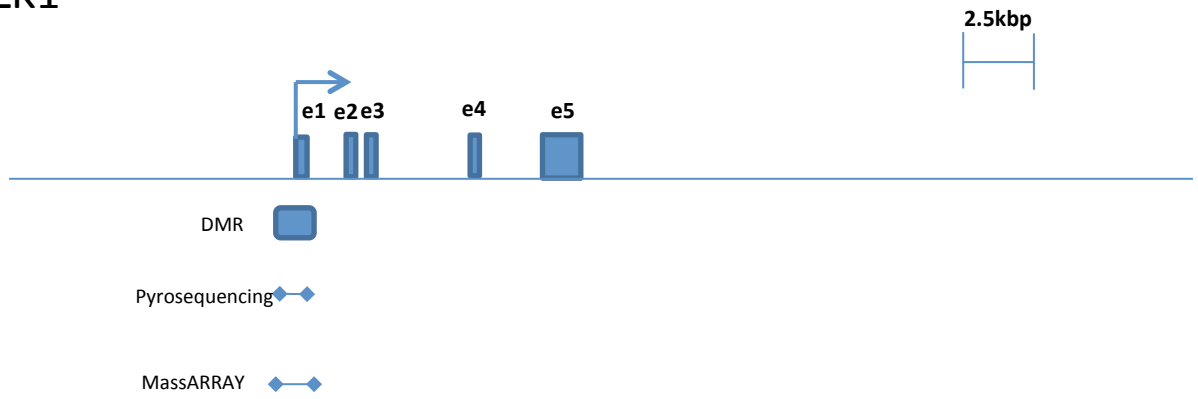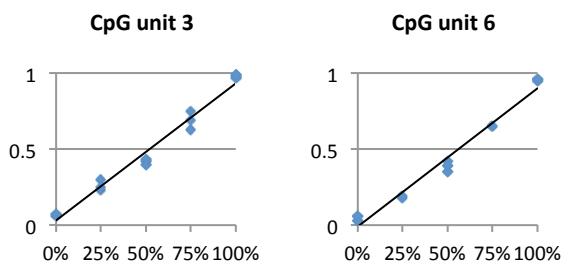

# IG-DMR, MEG3-CG7

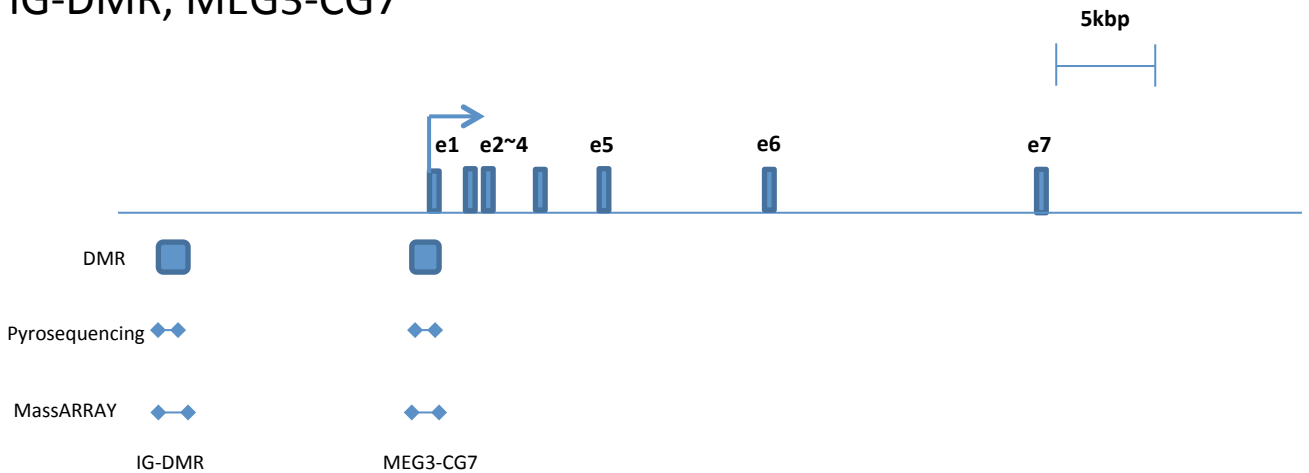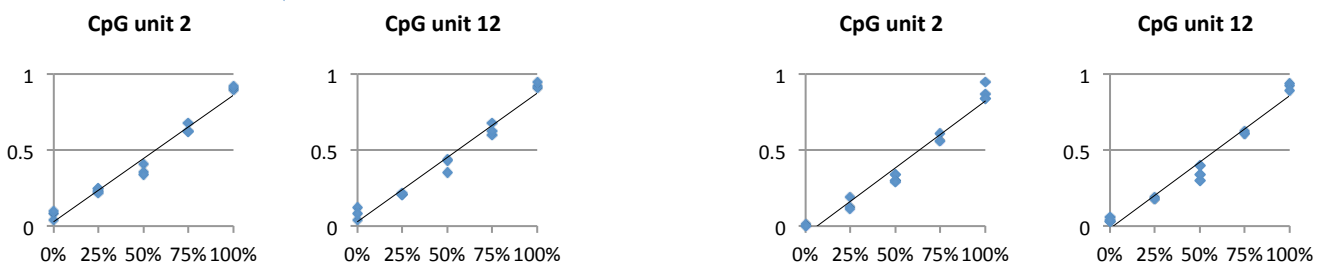



# SNRPN

1kbp

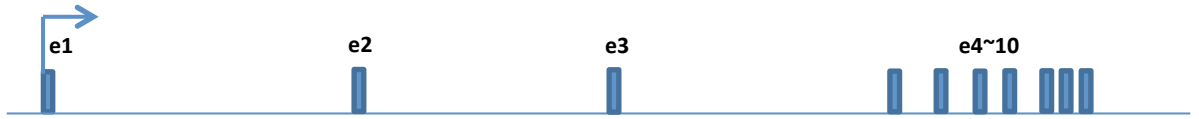

DMR 

Pyrosequencing 

MassARRAY 

CpG unit 2

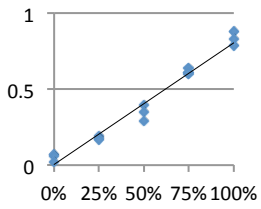

CpG unit 10

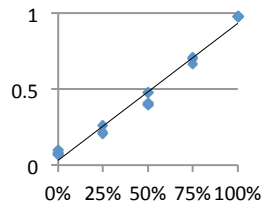

# PEG3

1kbp

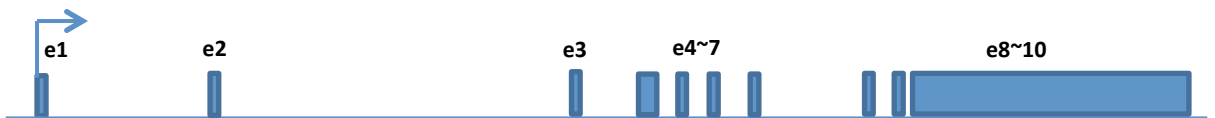

DMR 

Pyrosequencing 

MassARRAY 

CpG unit 2

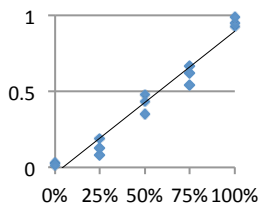

CpG unit 12

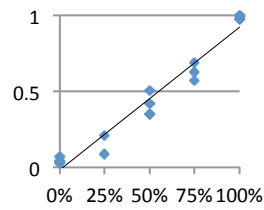

# MCTS2

1kbp

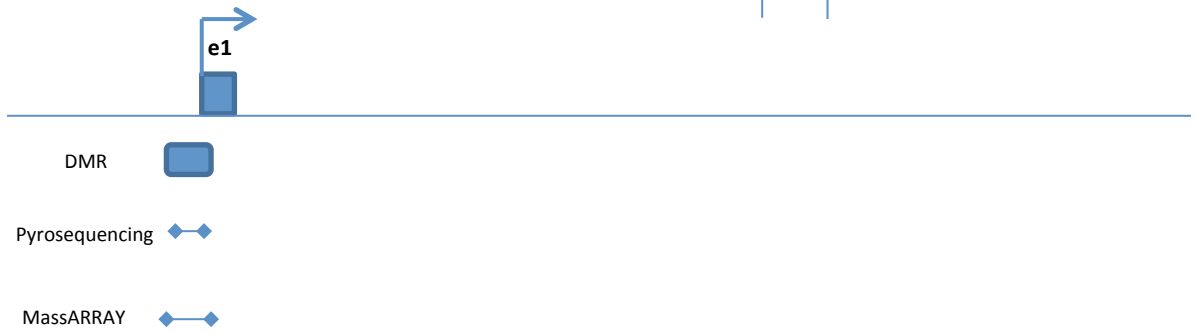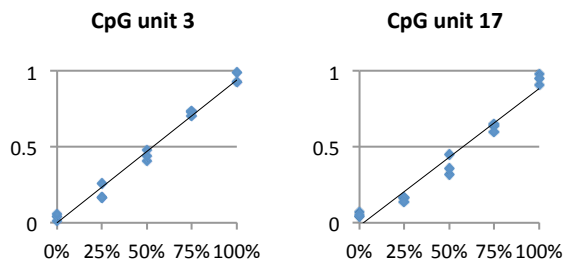

# NNAT

500bp

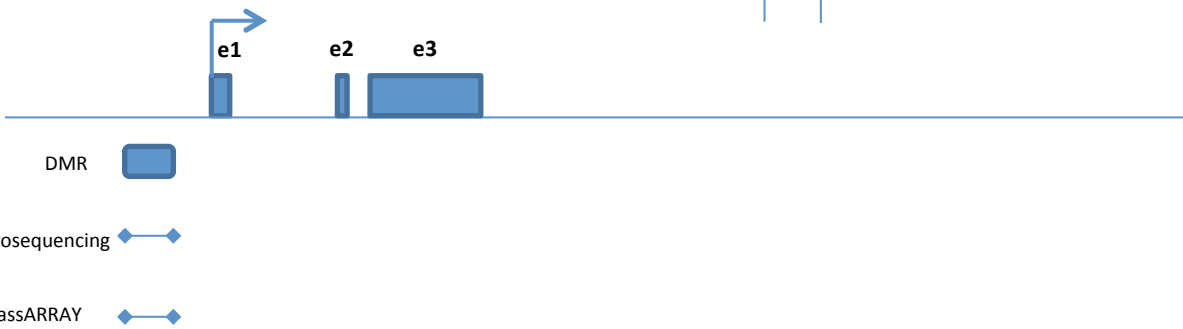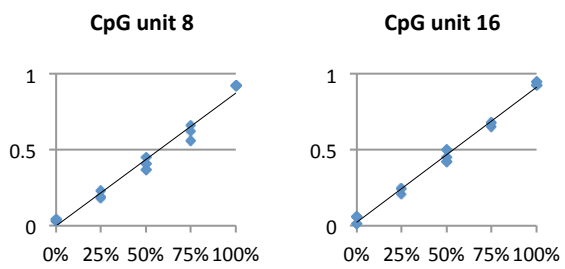

# L3MBTL1

1kbp

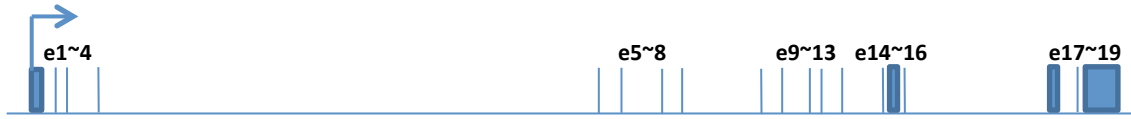

DMR

Pyrosequencing

MassARRAY

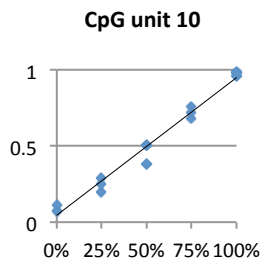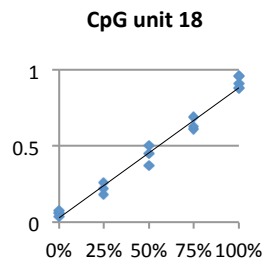

# NESP55, NESPAS, GNASXL, GNAS

10kbp

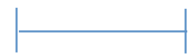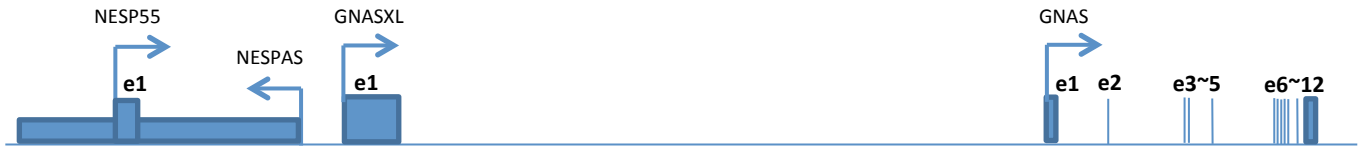

DMR

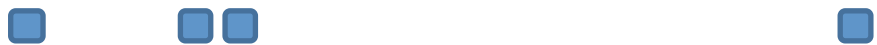

Pyrosequencing

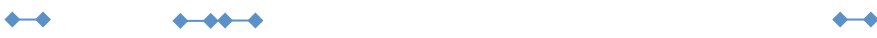

MassARRAY

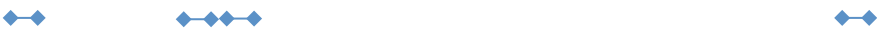

**CpG unit 8**

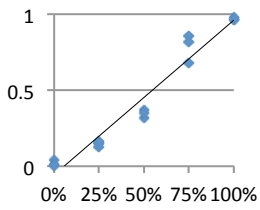

**CpG unit 1**

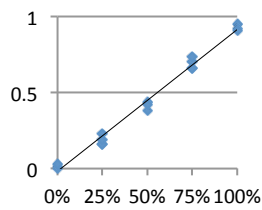

**CpG unit 4**

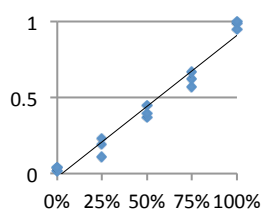

**CpG unit 4**

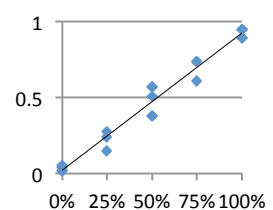

**CpG unit 11**

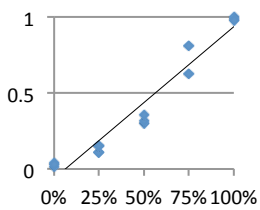

**CpG unit 9**

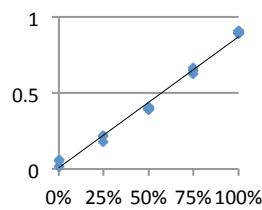

**CpG unit 10**

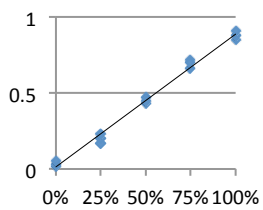

**CpG unit 13**

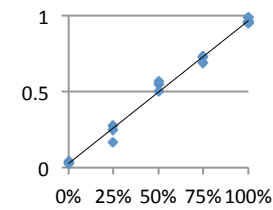

Supplement: gim201446x1.pdf [file gim201446x1.pdf]
