# Supplementary figures and images for: Comprehensive and quantitative multilocus methylation analysis reveals the susceptibility of specific imprinted differentially methylated regions to aberrant methylation in Beckwith–Wiedemann syndrome with epimutations
Source: PubMed Central journal article supplement — Genet Med. 2014 May 8;16(12):903–12. doi: 10.1038/gim.2014.46 (PMC4262761; doi:10.1038/gim.2014.46), 2014-05-08

Supplementary Figure S2

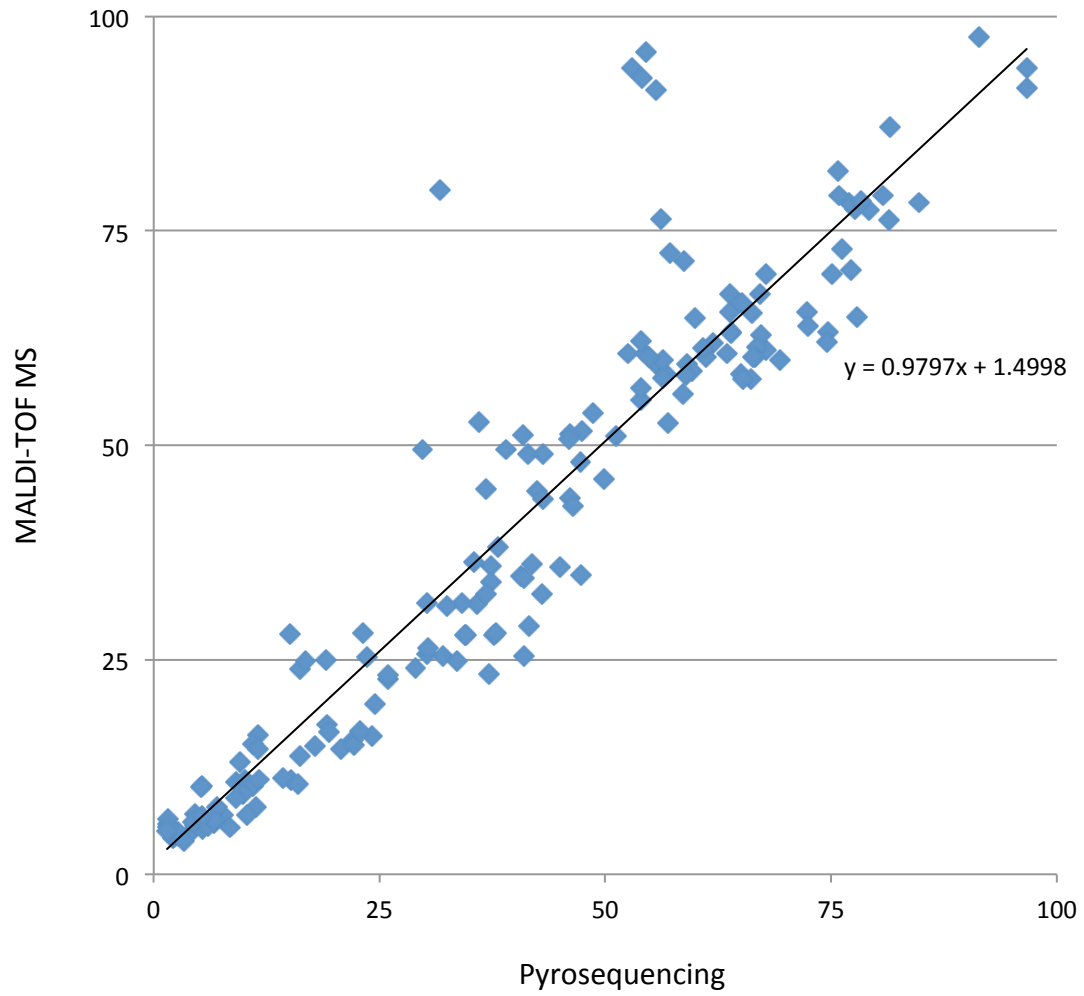

Supplement: gim201446x2.pdf [file gim201446x2.pdf]

Supplementary Figure S5

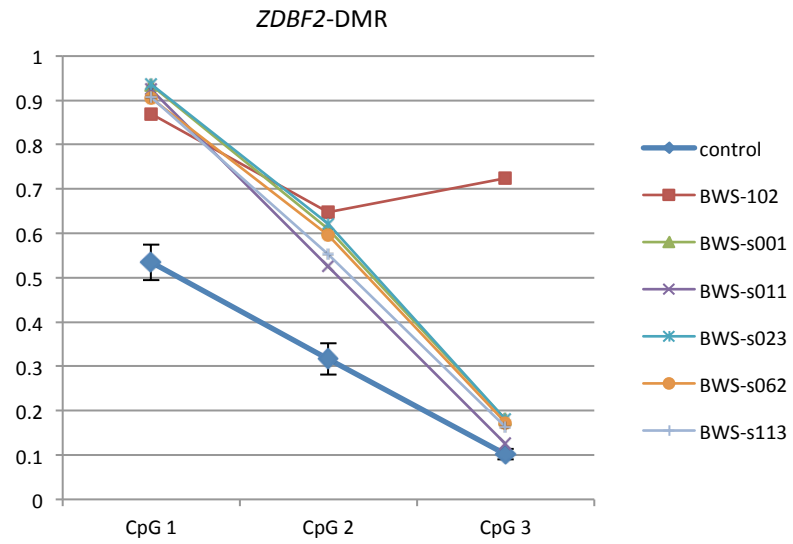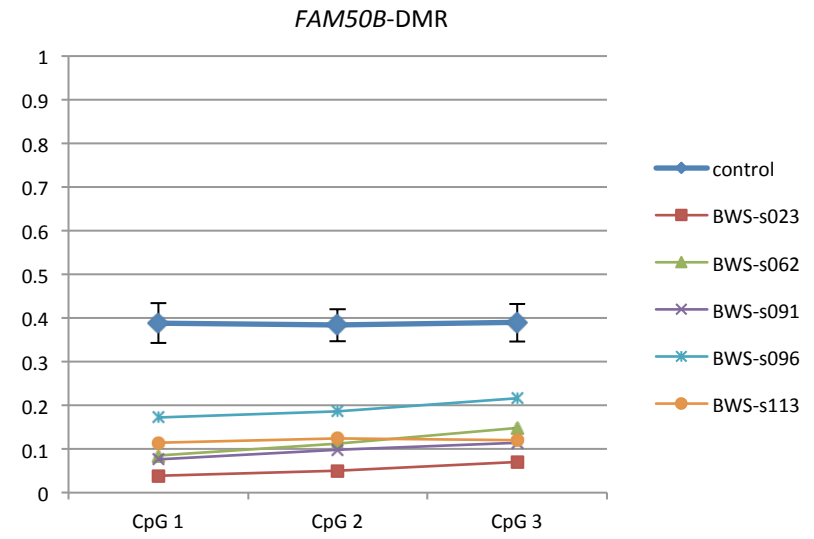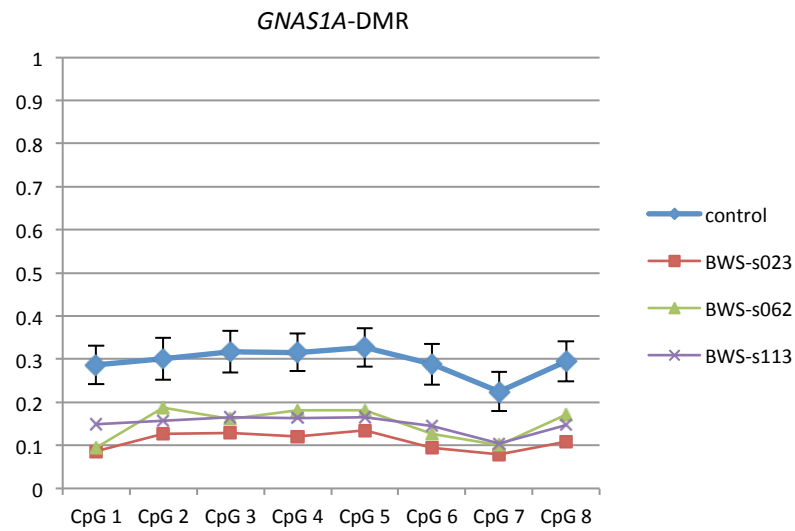

Supplement: gim201446x5.pdf [file gim201446x5.pdf]

Supplementary Figure S6

a

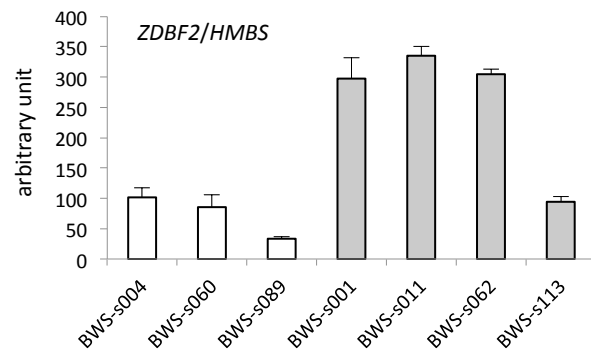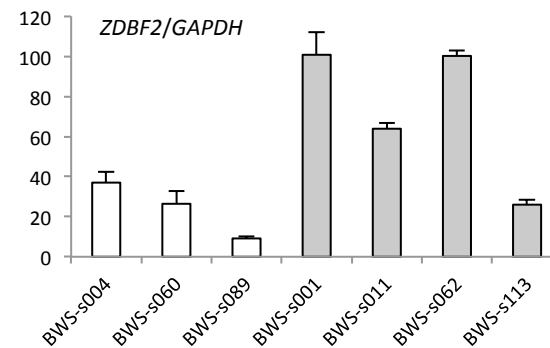

b

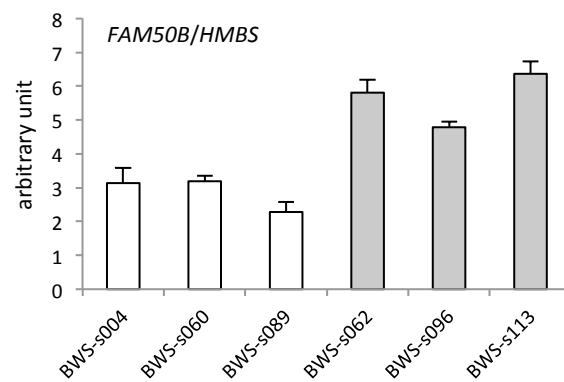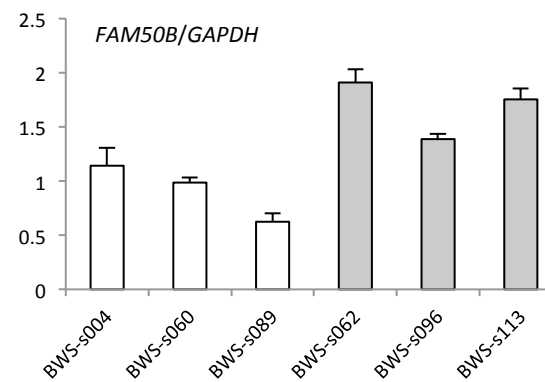

Supplement: gim201446x6.pdf [file gim201446x6.pdf]
